# Supplementary material for: Mapping Strategies to Assess and Increase the Validity of Published Disproportionality Signals: A Meta-Research Study
Source: Springer Nature journal article supplement (doi:10.1007/s40264-023-01329-w), 2023-07-08
Supplement: MOESM1 [file 40264_2023_1329_MOESM1_ESM.pdf]

## SUPPLEMENTARY MATERIAL

### Mapping Strategies to Assess and Increase the Credibility of Published Disproportionality Signals: A Meta-Research Study.

**Running Title:** Mapping strategies to assess credibility in disproportionality signals.

**Authors:** Michele Fusaroli<sup>1</sup>, Francesco Salvo<sup>2,3</sup>, Claire Bernardeau<sup>4</sup>, Maryam Idris<sup>2</sup>, Charles Dolladille<sup>5,6</sup>, Antoine Pariente<sup>2,3</sup>, Elisabetta Poluzzi<sup>1</sup>, Emanuel Raschi<sup>1\*</sup>, Charles Khouri<sup>4,7\*</sup>

**Affiliations:**

<sup>1</sup> *Pharmacology unit, Department of medical and surgical sciences, university of Bologna, Bologna, Italy*

<sup>2</sup> *Univ. Bordeaux, INSERM, BPH, U1219, Team AHead, F-33000 Bordeaux, France*

<sup>3</sup> *CHU de Bordeaux, Pôle de Santé Publique, Service de Pharmacologie Médicale, F-33000 Bordeaux, France*

<sup>4</sup> *Grenoble Alpes University Hospital, Pharmacovigilance Unit, Grenoble, France*

<sup>5</sup> *UNICAEN, EA4650 SEILIRM, CHU de Caen Normandie, Normandie University, Caen, France.*

<sup>6</sup> *Department of Pharmacology, CHU de Caen Normandie, Caen, France.*

<sup>7</sup> *Univ. Grenoble Alpes, HP2 Laboratory, Inserm U1300, Grenoble, France*

*\*co-last authors*

**Corresponding author:** Michele Fusaroli. E-mail address: [michele.fusaroli2@unibo.it](mailto:michele.fusaroli2@unibo.it)

| Variables Group             | Variables subcluster                  | Variable                | Description                                                                                | Accepted values                                         |
|-----------------------------|---------------------------------------|-------------------------|--------------------------------------------------------------------------------------------|---------------------------------------------------------|
| General Information         | Article details                       | ID                      | Identification number for internal operative reference                                     | integral (1-100)                                        |
|                             |                                       | Title                   | Title of the article                                                                       | character                                               |
|                             |                                       | Brief                   | Whether the article was a brief or a full article                                          | boolean (Y/N)                                           |
|                             |                                       | PMID                    | PMID                                                                                       | integral                                                |
|                             |                                       | Year                    | Year of publication                                                                        | integral (1997-2019)                                    |
|                             | Journal details                       | Journal Title           | Name of the journal                                                                        | factor                                                  |
|                             |                                       | Journal Category        | category of the journal                                                                    | factor<br>(medical/pharmacological)                     |
|                             |                                       | Impact Factor           | impact factor of the journal (2020)                                                        | numeric                                                 |
|                             | Study general design                  | Medicinal Product Class | Name of the drug class (if possible) investigated                                          | factor                                                  |
|                             |                                       | Medicinal Products      | Name of the individual drugs investigated                                                  | factor                                                  |
|                             |                                       | Adverse Events          | Name of the adverse events investigated                                                    | factor                                                  |
|                             |                                       | Population              | Population investigated with the main analysis                                             | factor                                                  |
|                             | Pharmacovigilance Analyses Robustness | Database used           | Database                                                                                   | Name of the spontaneous reporting system used (acronym) |
| More than one database      |                                       |                         | Whether more than one spontaneous reporting system was used                                | boolean (Y/N)                                           |
| Disproportionality Analysis |                                       | ROR                     | Whether the Reporting Odds Ratio was calculated as a measure of disproportionality         | boolean (Y/N)                                           |
|                             |                                       | PRR                     | Whether the Proportional Reporting Ratio was calculated as a measure of disproportionality | boolean (Y/N)                                           |

|  |                       |                             |                                                                                                                                                  |               |
|--|-----------------------|-----------------------------|--------------------------------------------------------------------------------------------------------------------------------------------------|---------------|
|  |                       | <b>EBGM</b>                 | Whether the Empirical Bayes Geometric Mean was calculated as a measure of disproportionality                                                     | boolean (Y/N) |
|  |                       | <b>IC</b>                   | Whether the Information Component was calculated as a measure of disproportionality                                                              | boolean (Y/N) |
|  | <b>Case-by-Case</b>   | <b>causality assessment</b> | whether a case-by-case causality assessment, using a causality score or searching for alternative explanations in each report, was performed     | boolean (Y/N) |
|  | <b>Strength</b>       | <b>N° drugs</b>             | number of drugs investigated                                                                                                                     | integer       |
|  |                       | <b>N° events</b>            | number of events investigated                                                                                                                    | integer       |
|  |                       | <b>Correction</b>           | whether a correction for multiple comparisons was performed                                                                                      | boolean (Y/N) |
|  |                       | <b>Adjusted</b>             | whether an adjustment on one or more variables was performed                                                                                     | boolean (Y/N) |
|  |                       | <b>Specifications</b>       | specifications about the kind of adjustment (e.g., sex, age) or the correction method (e.g., Benjamini-Hochberg, Bonferroni, Holm-Bonferroni)    | factor        |
|  | <b>Consistency</b>    | <b>Consistency</b>          | Whether the disproportion was calculated on multiple subpopulations to see if it was consistent                                                  | boolean (Y/N) |
|  |                       | <b>Subpopulation</b>        | Subpopulations on which the consistency was tested (e.g., sex, age, country, reporter type...)                                                   | factor        |
|  | <b>ROR time-trend</b> | <b>ROR time-trend</b>       | Whether the evolution of the ROR was investigated                                                                                                | boolean (Y/N) |
|  | <b>Coherence</b>      | <b>MedDRA hierarchy</b>     | whether an attempt to consider MedDRA preferred terms redundancy was performed using higher level of the MedDRA hierarchy (i.e., HLT, HLGT, SOC) | boolean (Y/N) |
|  |                       | <b>SMQ</b>                  | whether an attempt to consider MedDRA preferred terms redundancy was performed using standardized meddra queries                                 | boolean (Y/N) |

|                        |                            |                            |                                                                                                                                         |               |
|------------------------|----------------------------|----------------------------|-----------------------------------------------------------------------------------------------------------------------------------------|---------------|
|                        |                            | <b>other query</b>         | whether an attempt to consider MedDRA preferred terms redundancy was performed using other non-standardized queries                     | boolean (Y/N) |
|                        | <b>Specificity</b>         | <b>positive control</b>    | whether a well-known association between a drug and an event was searched for to test the sensitivity of the disproportionality         | boolean (Y/N) |
|                        |                            | <b>negative control</b>    | whether a well-known lack of association between a drug and an event was searched for to test the specificity of the disproportionality | boolean (Y/N) |
|                        | <b>Time to onset</b>       | <b>time to onset</b>       | whether the delay between drug administration and onset of the event was investigated                                                   | boolean (Y/N) |
|                        | <b>Exclusion of bias</b>   | <b>exclusion of bias</b>   | whether plausible biases were considered and accounted for in the analyses                                                              | boolean (Y/N) |
|                        |                            | <b>bias type</b>           | name of the biases considered                                                                                                           | factor        |
|                        | <b>Biological gradient</b> | <b>biological gradient</b> | whether the correlation between specified doses and the event was investigated                                                          | boolean (Y/N) |
|                        | <b>Reversibility</b>       | <b>reversibility</b>       | whether dechallenge and rechallenge rates were considered                                                                               | boolean (Y/N) |
| <b>Study Rationale</b> | <b>Literature-based</b>    | <b>Pre-clinical</b>        | whether a study-rationale based on pre-clinical published results was specified in the introduction                                     | boolean (Y/N) |
|                        |                            | <b>Case report</b>         | whether a study-rationale based on one or more case-reports was specified in the introduction                                           | boolean (Y/N) |
|                        |                            | <b>Clinical Trial</b>      | whether a study-rationale based on clinical trials was specified in the introduction                                                    | boolean (Y/N) |
|                        |                            | <b>Observational</b>       | whether a study-rationale based on observational published results was specified in the introduction                                    | boolean (Y/N) |
|                        |                            | <b>Pharmaco-vigilance</b>  | whether a study-rationale based on pharmacovigilance–on spontaneous reporting data– published results was specified in the introduction | boolean (Y/N) |

|                           |                                      |                          |                                                                                                                                                                         |               |
|---------------------------|--------------------------------------|--------------------------|-------------------------------------------------------------------------------------------------------------------------------------------------------------------------|---------------|
|                           | <b>Methodological</b>                | <b>Methodological</b>    | whether the rationale of the study is methodological (e.g., to test different disproportionality measures)                                                              | boolean (Y/N) |
|                           | <b>Regulatory</b>                    | <b>Regulatory</b>        | whether the rationale of the study is regulatory (e.g., based on notoriety, novelty of the drug, risk management plans or warnings)                                     | boolean (Y/N) |
| <b>Literature support</b> | <b>Passive support</b>               | <b>Preclinical</b>       | whether preclinical studies supporting the signal were considered in the discussion (and not in the introduction as a study rationale)                                  | boolean (Y/N) |
|                           |                                      | <b>Case-report</b>       | whether case-report supporting the signal were considered in the discussion (and not in the introduction as a study rationale)                                          | boolean (Y/N) |
|                           |                                      | <b>Clinical trials</b>   | whether clinical trials supporting the signal were considered in the discussion (and not in the introduction as a study rationale)                                      | boolean (Y/N) |
|                           |                                      | <b>Observational</b>     | whether observational studies supporting the signal were considered in the discussion (and not in the introduction as a study rationale)                                | boolean (Y/N) |
|                           |                                      | <b>Pharmacovigilance</b> | whether other pharmacovigilance (disproportionality) studies supporting the signal were considered in the discussion (and not in the introduction as a study rationale) | boolean (Y/N) |
|                           |                                      | <b>Systematic Review</b> | whether a previously published systematic review supporting the signal was considered in the discussion (and not in the introduction as a study rationale)              | boolean (Y/N) |
|                           | <b>Active literature elaboration</b> | <b>Systematic Review</b> | whether the disproportionality was integrated with an active effort to perform a systematic review on the topic                                                         | boolean (Y/N) |
| <b>New Clinical Data</b>  | <b>Case Report</b>                   | <b>Case Report</b>       | whether the Disproportionality was proposed as an integration of a case-report                                                                                          | boolean (Y/N) |
|                           | <b>Case series</b>                   | <b>Case series</b>       | whether the Disproportionality was proposed as an integration of a case-series                                                                                          | boolean (Y/N) |

|                                                                            |                            |                            |                                                                                                                                                                                                   |               |
|----------------------------------------------------------------------------|----------------------------|----------------------------|---------------------------------------------------------------------------------------------------------------------------------------------------------------------------------------------------|---------------|
|                                                                            | <b>Other observational</b> | <b>Other observational</b> | whether the Disproportionality was proposed as an integration of another observational study (e.g., data from a registry)                                                                         | boolean (Y/N) |
| <b>Pharmacovigilance-<br/>Pharmacodynamic-<br/>Pharmacokinetic studies</b> | <b>Literature support</b>  | <b>Literature support</b>  | whether the biological plausibility was discussed with data from the literature                                                                                                                   | boolean (Y/N) |
|                                                                            | <b>Pharmacodynamic</b>     | <b>Pharmacodynamic</b>     | whether the Disproportionalities were correlated with a pharmacodynamic index (e.g., occupancy, IC50, pKi), or whether the individual cases were referred to a specific pharmacodynamic mechanism |               |
|                                                                            | <b>Genetic</b>             | <b>Genetic data</b>        | whether the Disproportionalities were correlated with a genetic index (presence of a mutation), or whether the individual cases were referred to a specific genetic mechanism                     |               |
|                                                                            | <b>Pharmacokinetic</b>     | <b>Pharmacokinetic</b>     | whether the Disproportionalities were correlated with a pharmacokinetic index (e.g., lipophilicity, Vd), or whether the individual cases were referred to a specific pharmacokinetic mechanism    | boolean (Y/N) |
|                                                                            | <b>Index name</b>          | <b>Index name</b>          | Name of the indexes used                                                                                                                                                                          | Factor        |
| <b>Drug Utilization</b>                                                    | <b>drug utilization</b>    | <b>drug utilization</b>    | whether the disproportionality was integrated with measures of drug utilization (e.g., number of prescriptions to calculate an estimate of risk)                                                  | boolean (Y/N) |
